# Supplementary material for: Identification of novel prognostic markers of survival time in high-risk neuroblastoma using gene expression profiles
Source: PubMed Central journal article supplement (PMC7679032; doi:10.18632/oncotarget.27808), 2020-11-17
Supplement: oncotarget-11-4293-s001.pdf [file oncotarget-11-4293-s001.pdf]

## **Identification of novel prognostic markers of survival time in high-risk neuroblastoma using gene expression profiles**

### **SUPPLEMENTARY MATERIALS**

**Supplementary Text 1: The 1018 and 680 GENIE3 weighted interactions of DEGs in the SS and LS groups, respectively. See Supplementary Text 1**
